# Supplementary material for: Multiple Co-Evolutionary Networks Are Supported by the Common Tertiary Scaffold of the LacI/GalR Proteins
Source: PLOS journal article supplement (doi:10.1371/journal.pone.0084398), 2013-12-31
Supplement: S3 (10.1371/journal.pone.0084398.s003) [file journal.pone.0084398.s003]

Supplemental data for:  
Multiple co-evolutionary networks are supported by the common  
tertiary scaffold of the LacI/GalR proteins  
File 3: 3D structural proximity vs score

Daniel J. Parente and Liskin Swint-Kruse

**List of Figures**

|     |                                                   |   |
|-----|---------------------------------------------------|---|
| S12 | Lack of 3D structural proximity: CcpA . . . . .   | 3 |
| S13 | Lack of 3D structural proximity: GalRS . . . . .  | 4 |
| S14 | Lack of 3D structural proximity: GntR . . . . .   | 5 |
| S15 | Lack of 3D structural proximity: PurR . . . . .   | 6 |
| S16 | Lack of 3D structural proximity: RbsR-A . . . . . | 7 |
| S17 | Lack of 3D structural proximity: TreR . . . . .   | 8 |

Figures S12-S17: Lack of 3D structural proximity. The lack of correlation between inter-atomic distance and co-evolution score is shown for each algorithm (panels), applied to each subfamily (figures). Points are plotted with 15% opacity to aid in visualization. Strength of co-evolution score does not correlate with inter-atomic distance. The marginal distributions (counts) of inter-atomic distances (right) and co-evolution scores (top) are displayed as histograms.

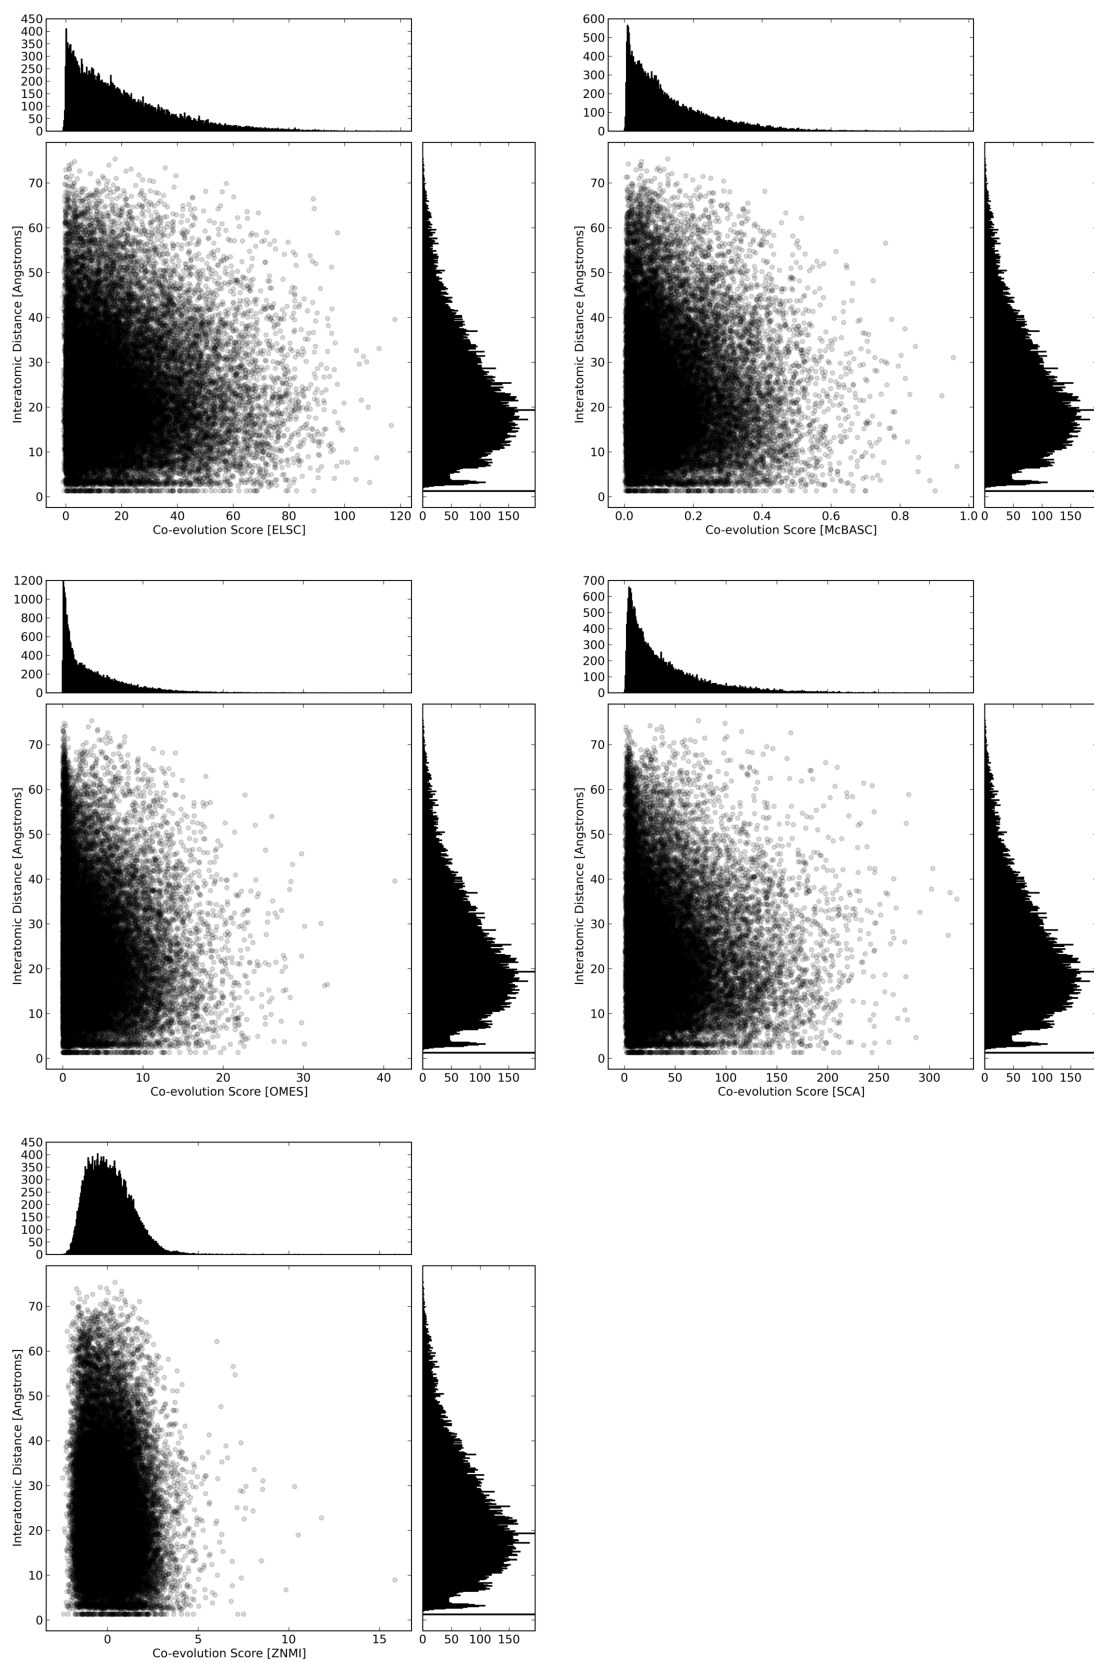

Figure S12: Lack of 3D structural proximity: CcpA

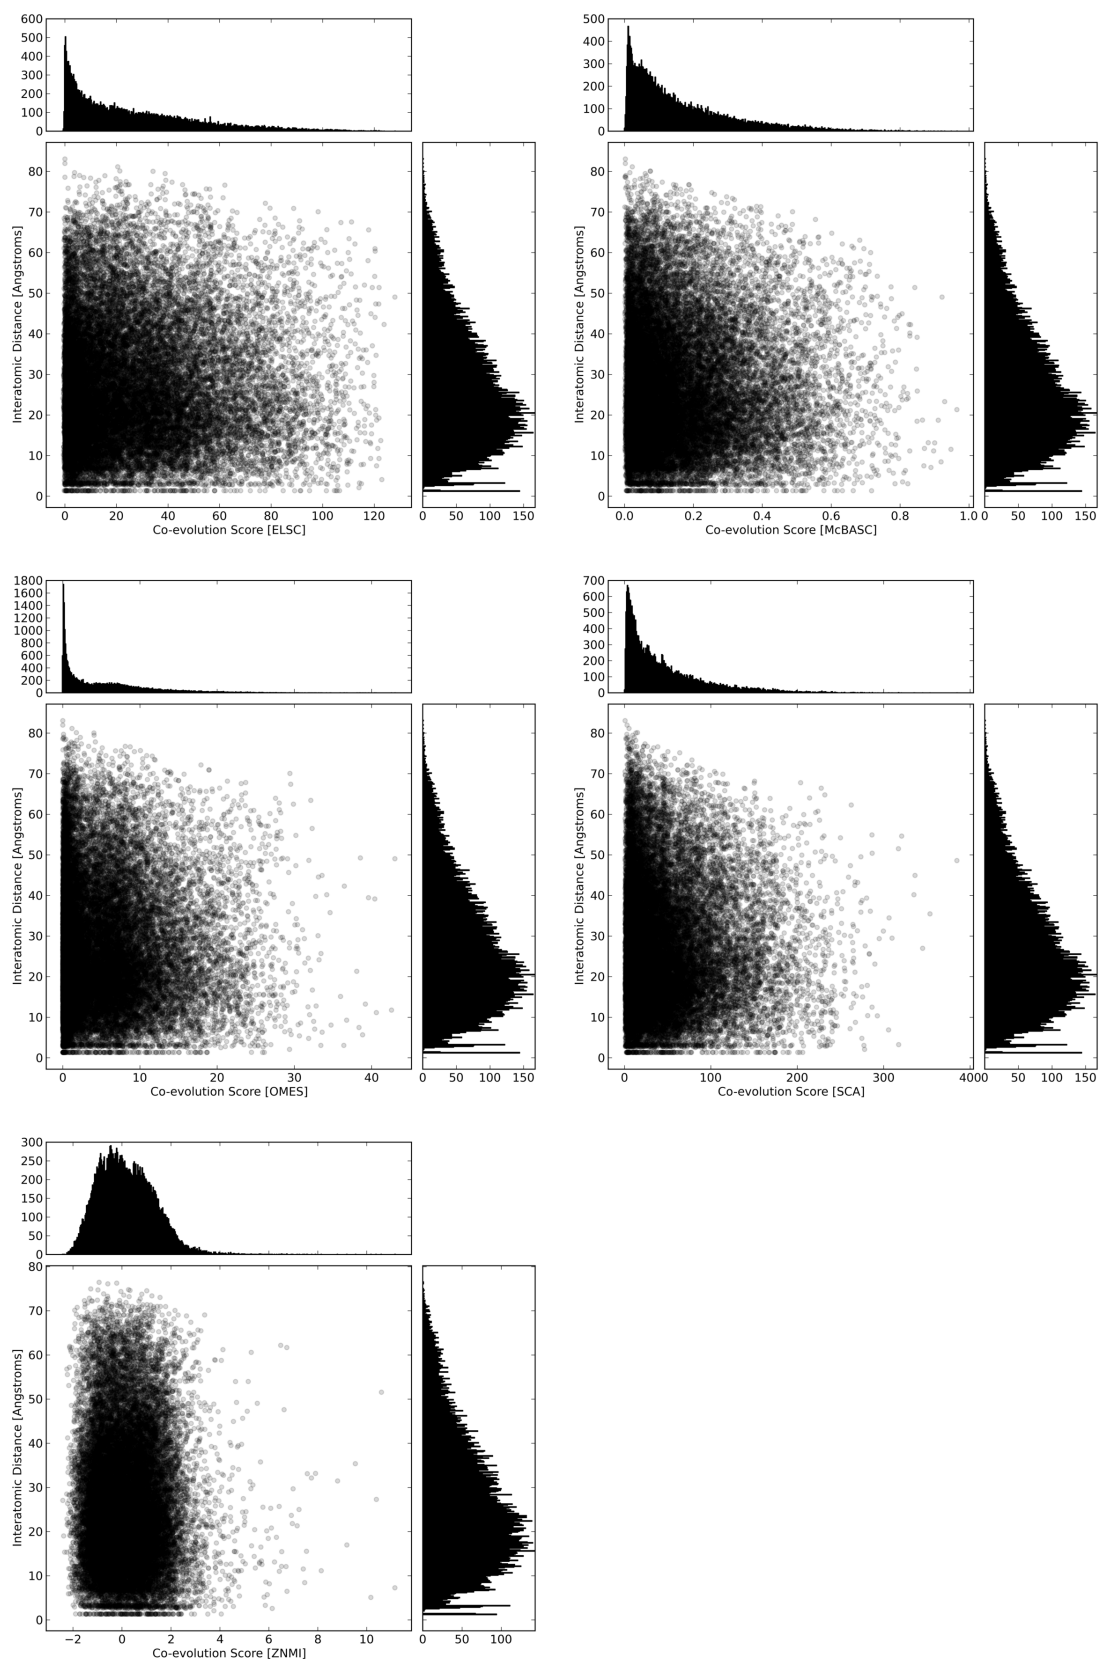

Figure S13: Lack of 3D structural proximity: GalRS

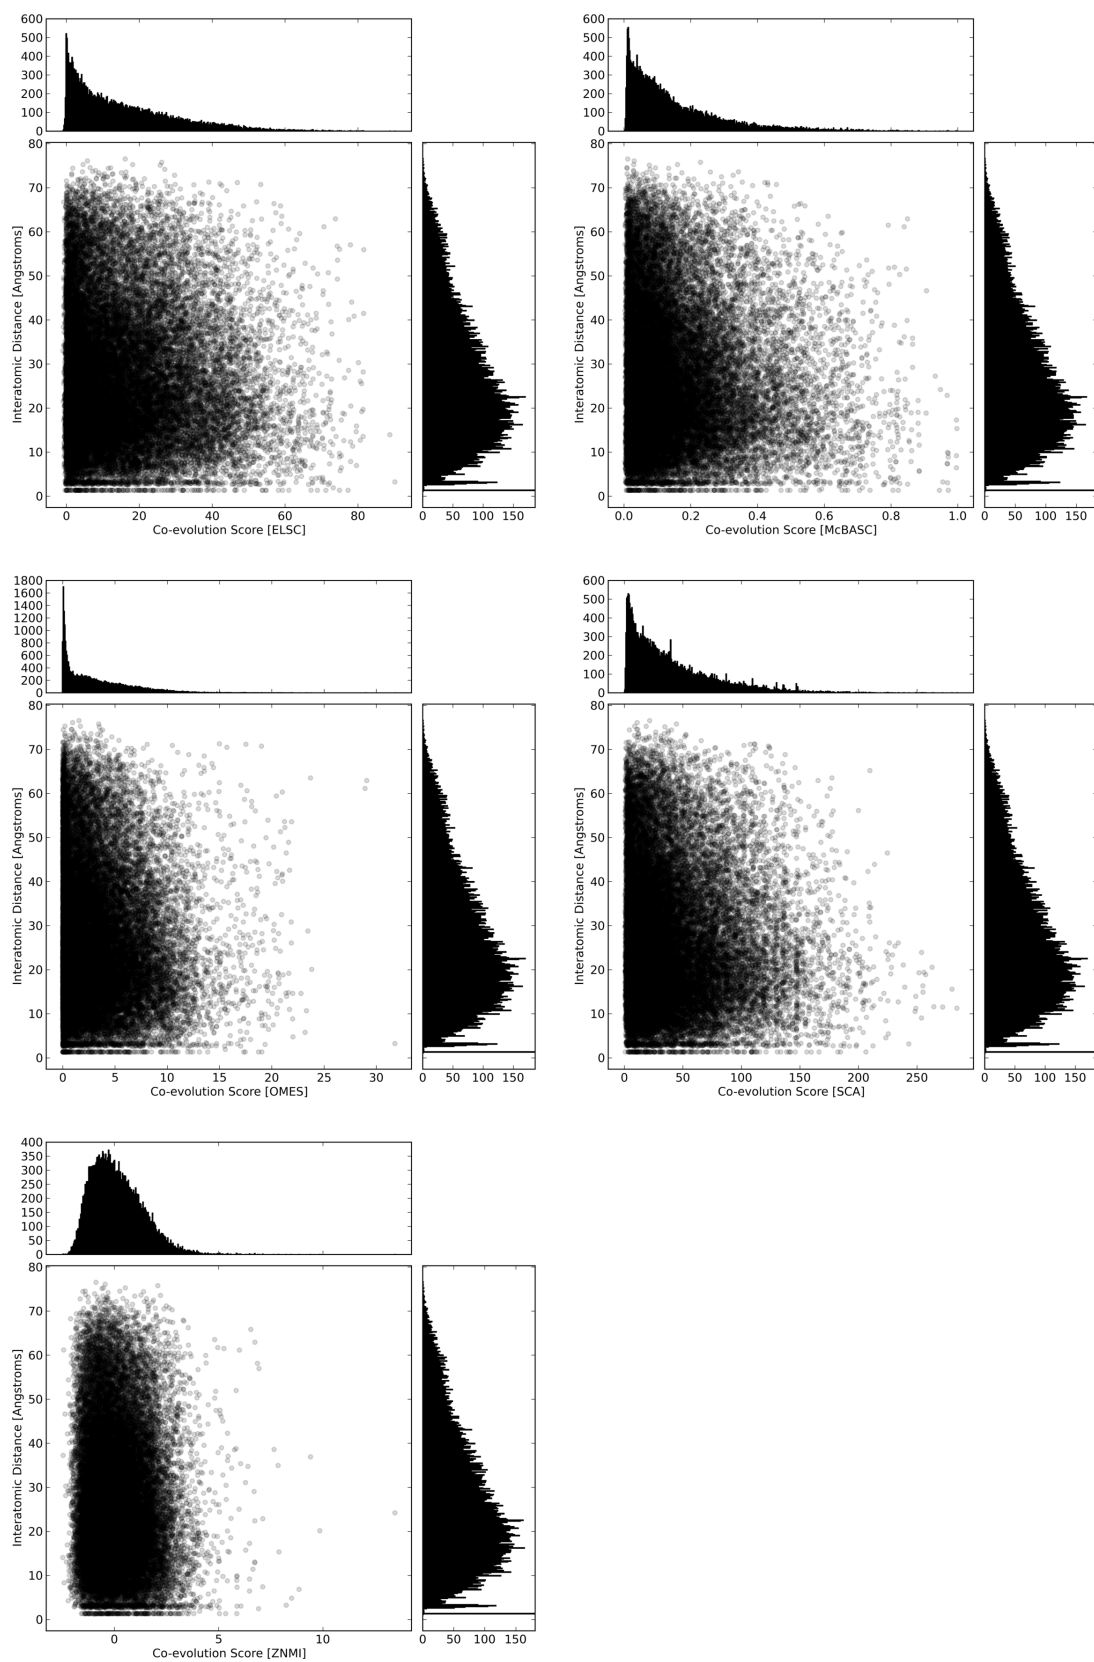

Figure S14: Lack of 3D structural proximity: GntR

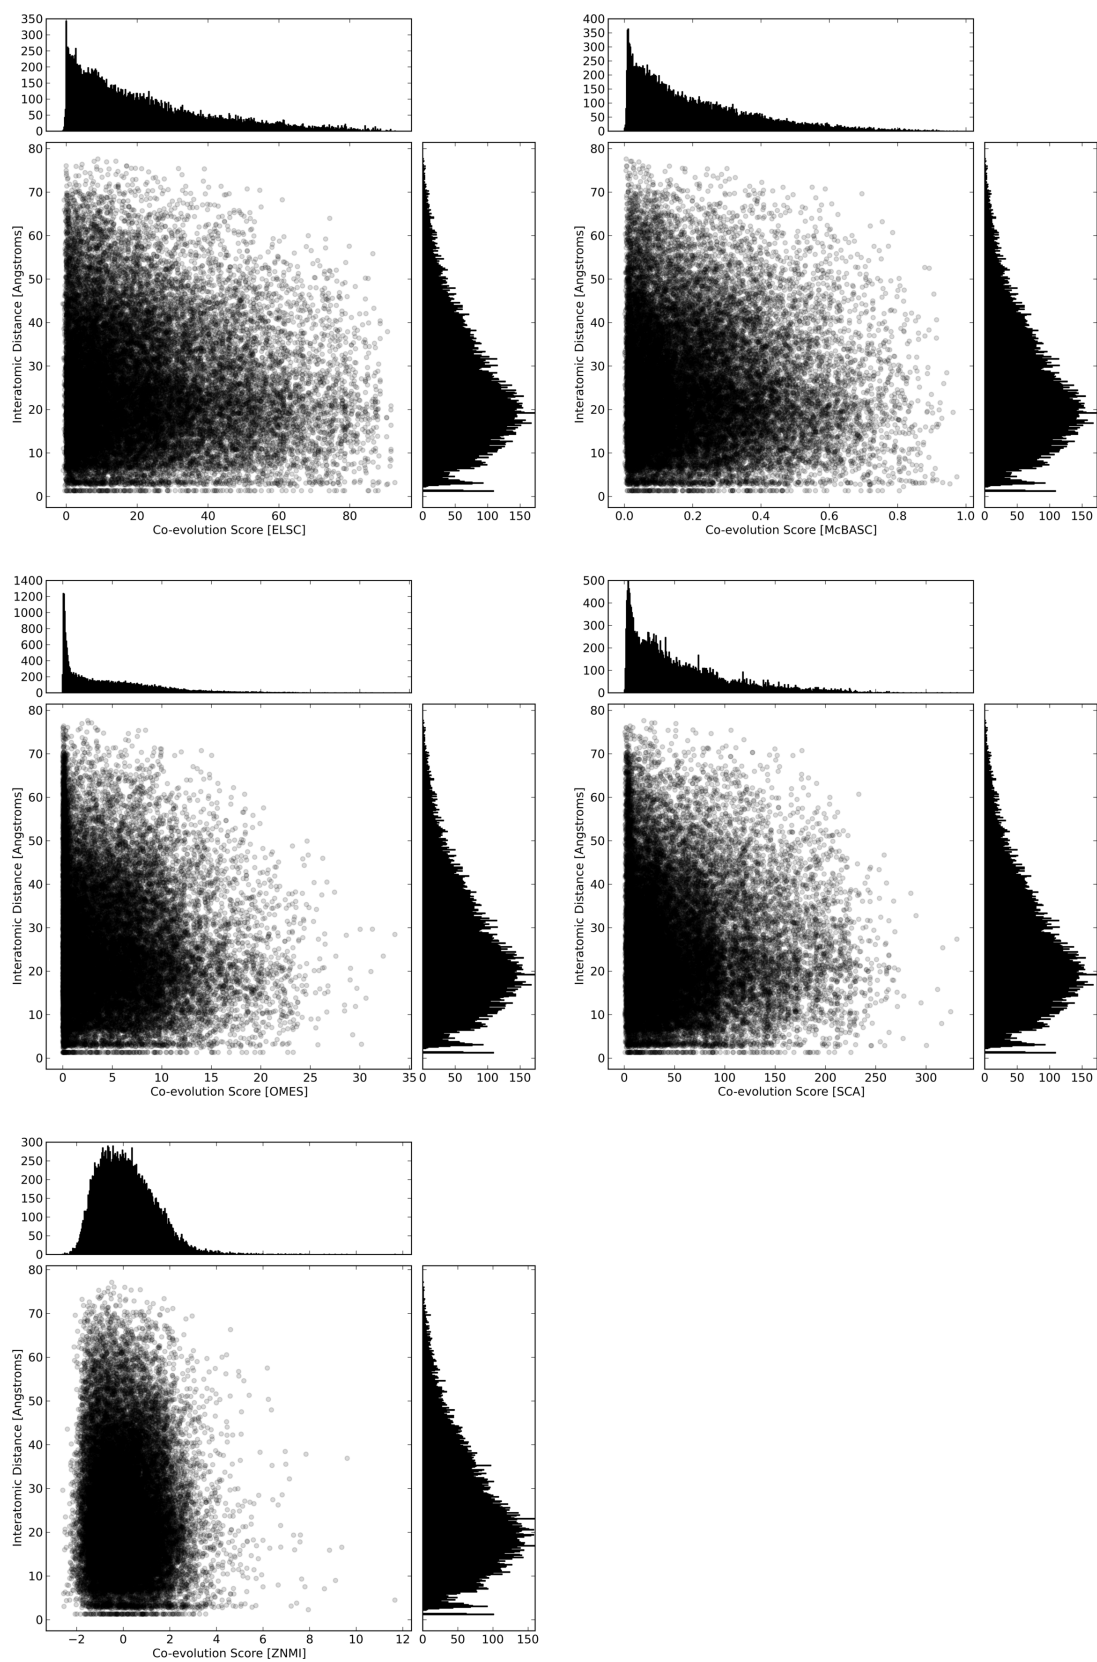

Figure S15: Lack of 3D structural proximity: PurR

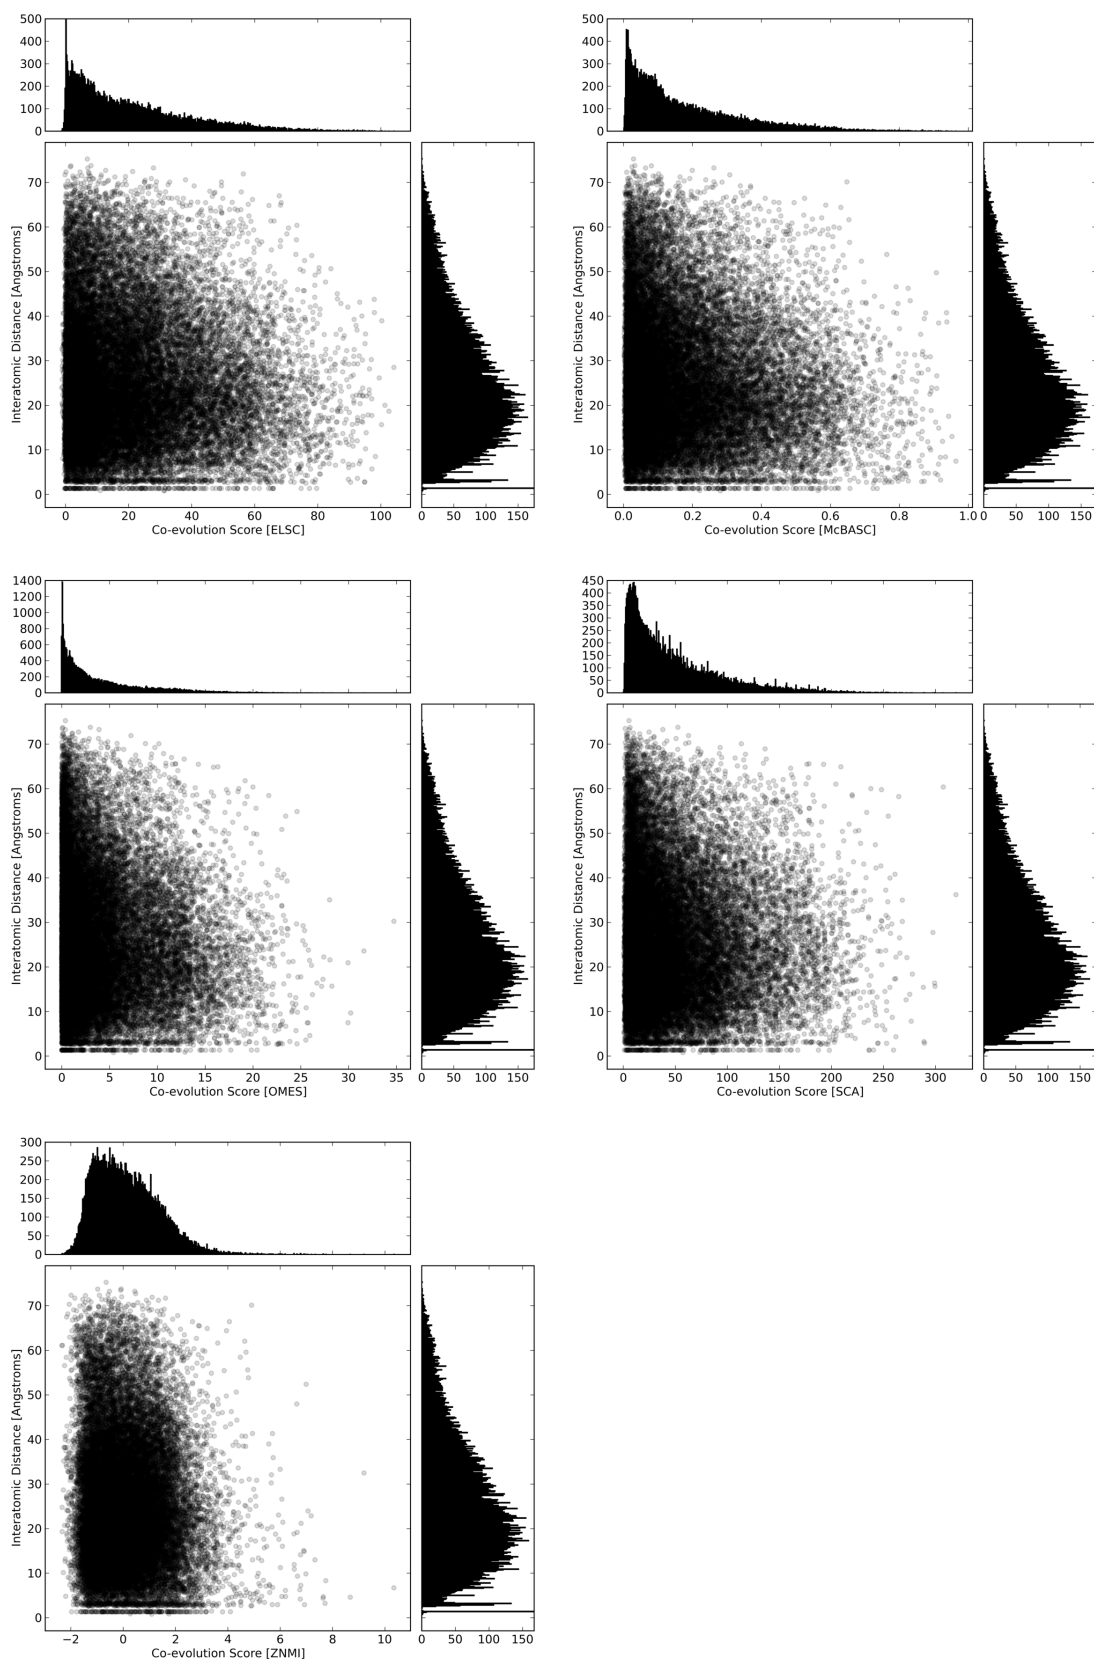

Figure S16: Lack of 3D structural proximity: RbsR-A

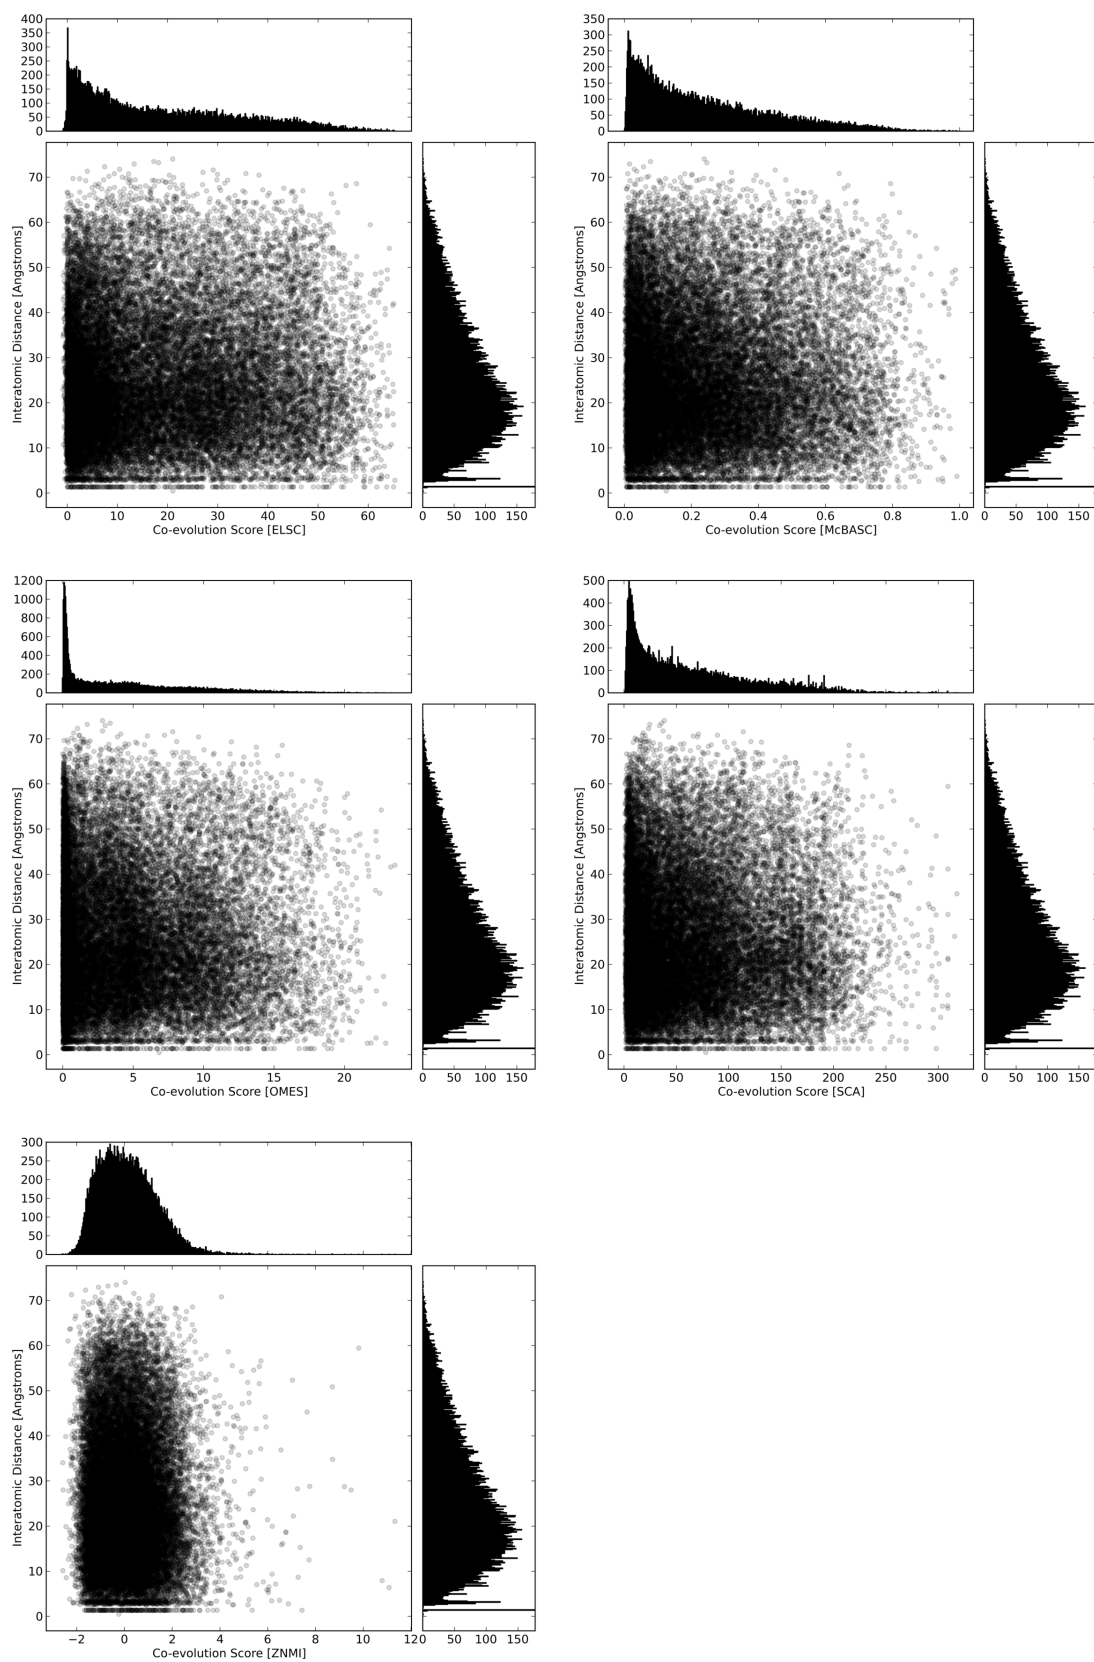

Figure S17: Lack of 3D structural proximity: TreR
